# Supplementary material for: In-depth nano-scale analysis of complex interactions of Hg with gold nanostructures using AFM-based power spectrum density method
Source: Royal Society of Chemistry journal article supplement (doi:10.1039/b816592k), 2009-01-01
Supplement: b816592k.pdf [file b816592k.pdf]

## Power Spectrum Density Method

Weierstrass-Mandelbrot (W-M) showed that many engineered nanosurfaces possess fractal geometry. Fractal dimensions are inversely proportional to the spatial frequency  $\omega$  (equation 1),

$$P(\omega) = 1/\omega (5 - 2D) \ln \gamma' \quad (1)$$

where,  $\gamma'$  is the parameter that determines the density of frequencies in the profile. Ausloos and Burman generalized the W-M algorithm by introducing multiple variables to account for higher dimensionally stochastic processes and developed the following equation 2,

$$z(\rho, \theta) = (\ln \gamma' \div M) \sum_{m=1}^M A_m \sum_{n=-\infty}^{\infty} (k\gamma^n)^{(D-3)} \{ \cos \phi_{m,n} - \cos[k\gamma^n \rho \cos(\theta - \alpha_m) + \phi_{m,n}] \} \quad (2)$$

where,  $\rho$  and  $\theta$  are planar coordinates of a surface point with height  $z$  and are related with planar Cartesian coordinates  $(x,y)$ .

The power spectral density (denoted as  $p$ ) of an isotropic 2-D fractal Brownian function which is denoted as  $f$  varies as:

$$Pf(x,y) \propto p^{-\beta} \quad (3)$$

$$\theta^{-1/2} = \tan(y/x) \quad (4)$$

where  $\beta \geq 0$ , and  $(x,y)$  are the planar Cartesian coordinates, and  $p = (x^2 + y^2)^{1/2}$  is the radial frequency.

The height function  $z$  of a fractal surface, exhibiting randomness in all planar direction making the surface three dimensional, is the real part of the Ausloos-Berman function.  $D$  is the fractal dimension ( $2 < D < 3$ ) and is a variant of the spatial frequencies. The parameter  $M$  denotes the number of superimposed ridges used to construct the surface. For instance, surfaces possessing cylindrical corrugations have  $M = 1$ . The anisotropy of the surface geometry is controlled by the magnitude of  $A_m$ . For example,  $A_m = A$  is for isotropic surface for all  $m$  values and  $A_m$  varies with  $m$  for anisotropic surfaces. The arbitrary angle  $\alpha_m$  is used to offset the ridges in the azimuthal direction and equals  $\pi m/M$  when all ridges are equally offset. The parameter  $k$  is a wave number related to the sample size,  $k = 2\pi/L$ . The uniform distribution of the values of random phase  $\phi_{m,n}$  in the interval  $[0, \pi]$  can be generated using a random number generator.

The exponent  $\beta$  in equation 3 is related to the fractal dimension,  $D_f$ :

$$\beta = 8 - 2D_f \quad (5)$$

Values of  $\beta$  and  $D_f$  are calculated from the slope of the linear part of a plot where the X-axis is expressed in linear measurement units that represent the spatial frequency or the wavelength of the fast Fourier transform (FFT) 2-D image and the Y-axis shows the relative intensity of the image components or PSD in arbitrary units.

The relationship between the fractal dimension and the assembly of nano-features on surfaces is relatively complicated for the 3-D features on the surface. In general,  $D_f$  values obtained using 2-D fractal analysis vary between 2 and 3, with  $D_f$  of 3

representing the densed or filled surface and  $D_f$  less than 3 represents departure from completely filled or dense structure to open or branch-like structures.
